# Supplementary material for: Phenanthroline Complexation Enhances the Cytotoxic Activity of the VO-Chrysin System
Source: MDPI journal article supplement (doi:10.3390/inorganics10010004), 2021-12-28
Supplement: s1 [file s1]

## **Supplementary Material**

### **Phenanthroline complexation enhances the cytotoxic activity of the VO-chrysin system**

Agustin Actis Dato<sup>1</sup>, Luciana G. Naso<sup>1</sup>, Marilin Rey<sup>2</sup>, Pablo J. Gonzalez<sup>2</sup>, Evelina G. Ferrer<sup>1</sup>, Patricia A.M. Williams<sup>1,\*</sup>.

<sup>1</sup>Centro de Química Inorgánica (CEQUINOR, UNLP, CONICET), Departamento de Química, Facultad de Ciencias Exactas, Universidad Nacional de La Plata, Bv. 120 N° 1465, CP 1900, La Plata, Buenos Aires, Argentina.

<sup>2</sup> Departamento de Física, Facultad de Bioquímica y Ciencias Biológicas, Universidad Nacional del Litoral and CONICET, S3000ZAA Santa Fe, Argentina.

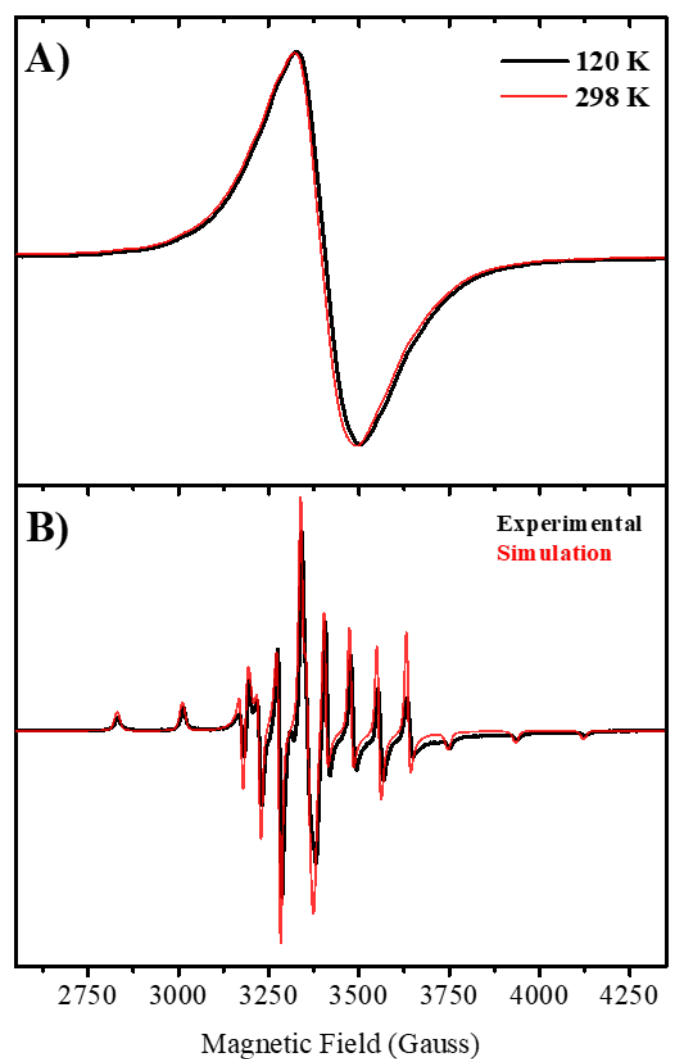

**Figure S1.** EPR spectrum of [VO(chrys)phenCl]. A) Powder sample at 120 K (black) and 298 K (red). B) Frozen DMSO solution EPR spectrum recorded at 120 K (black) together with simulation (red). EPR spectra of both powder and DMSO solution were recorded in a Bruker EMX-Plus spectrometer, equipped with a rectangular cavity. Experimental conditions: 100 kHz modulation field, 4 Gpp modulation amplitude and 2 mW microwave power. The spectra were baseline corrected using WinEPR Processing software (Bruker, Inc) and simulations were performed with the Easy Spin 5.2.3. toolbox based on MATLAB assuming an axial spin-Hamiltonian. The spin Hamiltonian parameters obtained were  $g_{||} = 1.941$ ;  $A_{||} = 162.2 \times 10^{-4} \text{ cm}^{-1}$ ;  $g_{\perp} = 1.977$ ;  $A_{\perp} = 59.5 \times 10^{-4} \text{ cm}^{-1}$ .

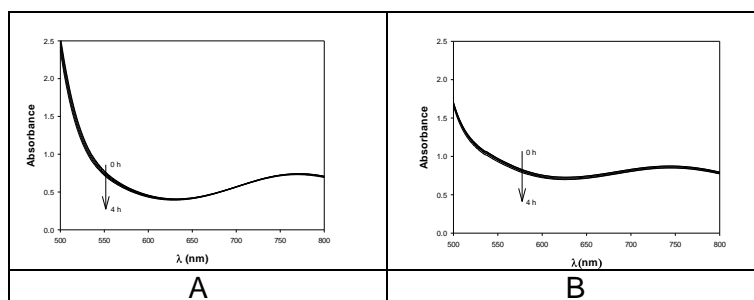

**Figure S2.** Spectral variation of a dissolution of [VO(chrys)phenCl] in A) DMSO, B) DMSO/H<sub>2</sub>O 1/99 ( $1 \times 10^{-2}$  M), during 4h.

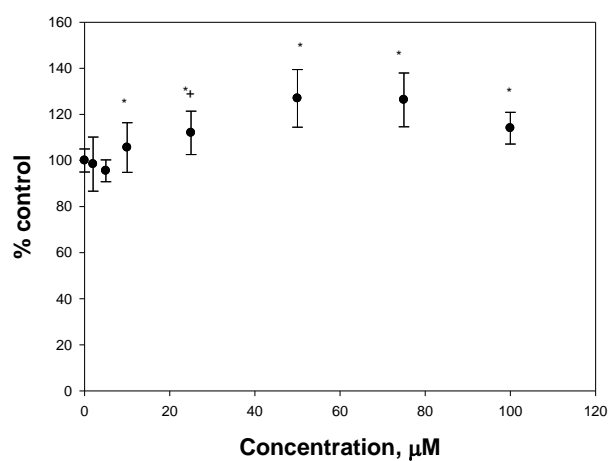

**Figure S3.** Cell viability assay at different of [VO(chrys)phenCl] concentrations after treatment for 24 h on HEK293 cells. The results are expressed as a percentage of the control level and represent the mean  $\pm$  the standard error of the mean (SEM) from three separate experiments. \* indicates significant values in comparison with the control level ( $p < 0.05$ ).

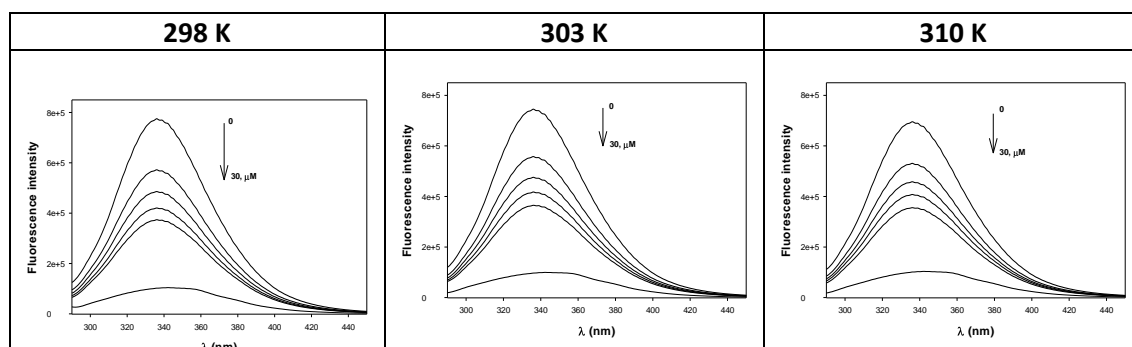

**Figure S4.** The fluorescence spectra of BSA at various temperatures for VOchrysen (0, 4, 6, 8, 10, 30  $\mu\text{M}$ ).  $\lambda_{\text{ex}} = 280 \text{ nm}$ ,  $[\text{BSA}] = 6 \mu\text{M}$ .

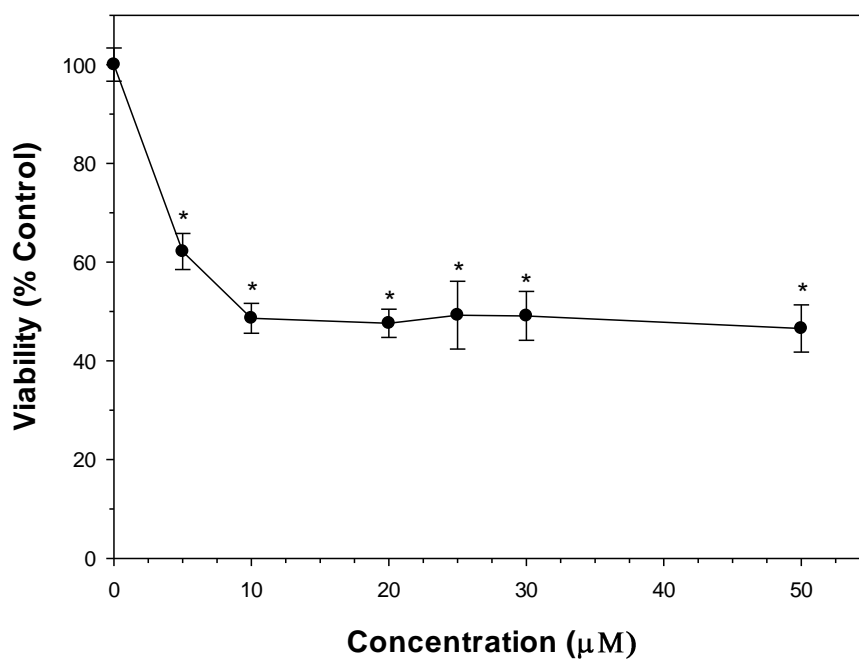

**Figure S5.** Cell viability assay of a mixture of sodium metavanadate, chrysin and phen (1:1:1), physiological pH at different concentrations after treatment for 24 h on A549 cells. The results are expressed as a percentage of the control level and represent the mean  $\pm$  the standard error of the mean (SEM) from three separate experiments. \* indicates significant values in comparison with the control level ( $p < 0.05$ ).

**Acquisition Parameter**

|             |            |                       |           |                  |           |
|-------------|------------|-----------------------|-----------|------------------|-----------|
| Source Type | ESI        | Ion Polarity          | Positive  | Set Nebulizer    | 0.4 Bar   |
| Focus       | Not active | Set Capillary         | 4000 V    | Set Dry Heater   | 200 °C    |
| Scan Begin  | 50 m/z     | Set End Plate Offset  | -500 V    | Set Dry Gas      | 4.0 l/min |
| Scan End    | 950 m/z    | Set Collision Cell RF | 150.0 Vpp | Set Divert Valve | Source    |

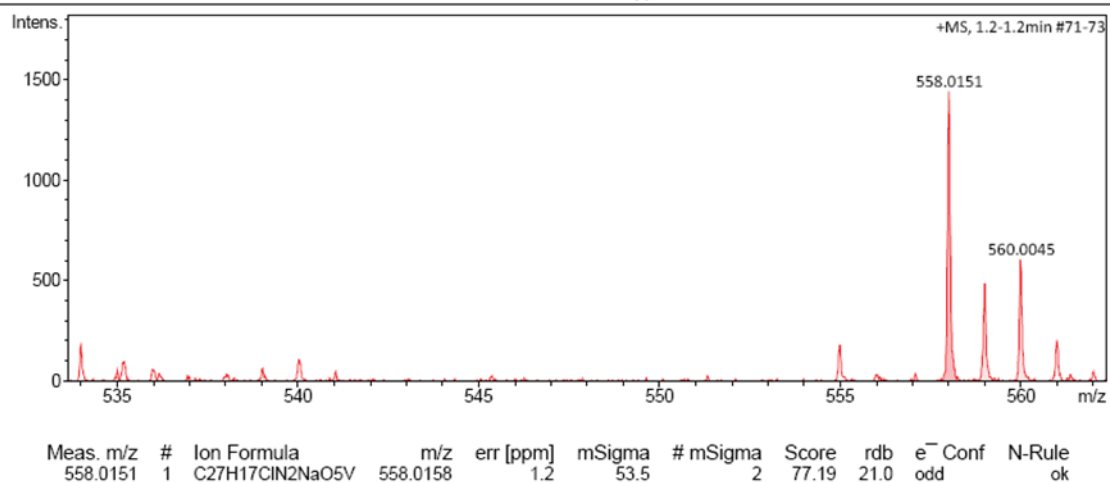

**Figure S6.** Electrospray ionization–mass spectrometry (ESI-MS) spectrum of [VO(chrys)phenCl]
